# Supplementary material for: Columnar and surface urban aerosol in Moscow megacity according to measurements and simulations with COSMO-ART model
Source: Copernicus journal article supplement (doi:10.5194/acp-2022-83), 2022-03-15
Supplement: Supplementary file [file acp-2022-83-AC2-supplement.pdf]

We are greatly appreciated the comments of the reviewer and his suggestions for including some additional analysis, which have been inserted in the new version of the text.

### Comment on acp-2022-83

Anonymous Referee #2

Referee comment on "Columnar and surface urban aerosol in Moscow megacity according to measurements and simulations with COSMO-ART model" by Natalia Chubarova et al., Atmos. Chem. Phys. Discuss., <https://doi.org/10.5194/acp-2022-83-RC2>, 2022

This work focuses on the aerosol properties on the ground and in the atmospheric column, and their relationship with meteorological parameters, in the urban environment of the Moscow megacity. Data include ground measurements of PM<sub>10</sub>, BC and gaseous precursors, columnar aerosol parameters retrieved by AERONET data, as well as modeled data obtained by the application of the COSMO-ART model. Additional data obtained in an upwind clean background site at Zvenigorod Scientific Station where used for the estimation of the urban component of the studied aerosol parameters. Overall, this is a very interesting work, based on sound experimental and numerical methods. To my knowledge, there are few works on the aerosol pollution in the Moscow megacity, rendering this information more valuable. I believe the manuscript merits publication, after some minor revisions are done, as indicated in the specific comments below.

*A careful editing of the whole manuscript is needed in order to correct syntax errors (e.g. in lines 39-40, 59-61, 66-68, 70-75, among others).*

We have edited the whole text focusing on improving the style and on removing syntax errors. All changes are shown in green color.

*Line 121: Please specify the time resolution of the eBC measurements, in accordance with the other online in situ measurements you mention above.*

Aerosol equivalent BC (eBC) mass concentrations were measured with 1-minute resolution. We added this information in the text.

“Aerosol equivalent BC (eBC) mass concentrations were measured **with 1-minute resolution** using custom-made portable aethalometer (Popovicheva et al., 2017).”

*Figure 2: Is the red circle displayed in the maps the measurement site? Please clarify.*

Yes, sorry, it was not clearly explained. Yes, this is a mark for the MSU MO location. The caption has been changed. We also inserted a mark for the Zvenigorod site location. See the updated Figure in the Supplement.

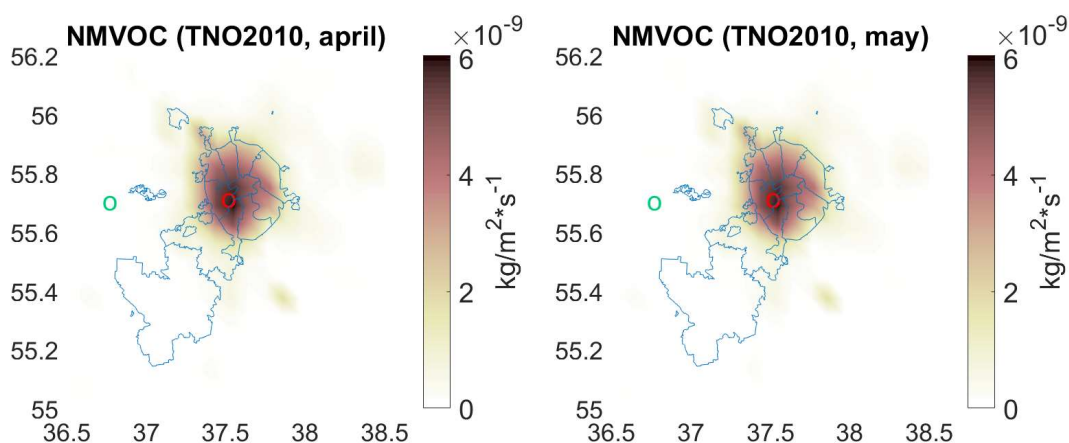

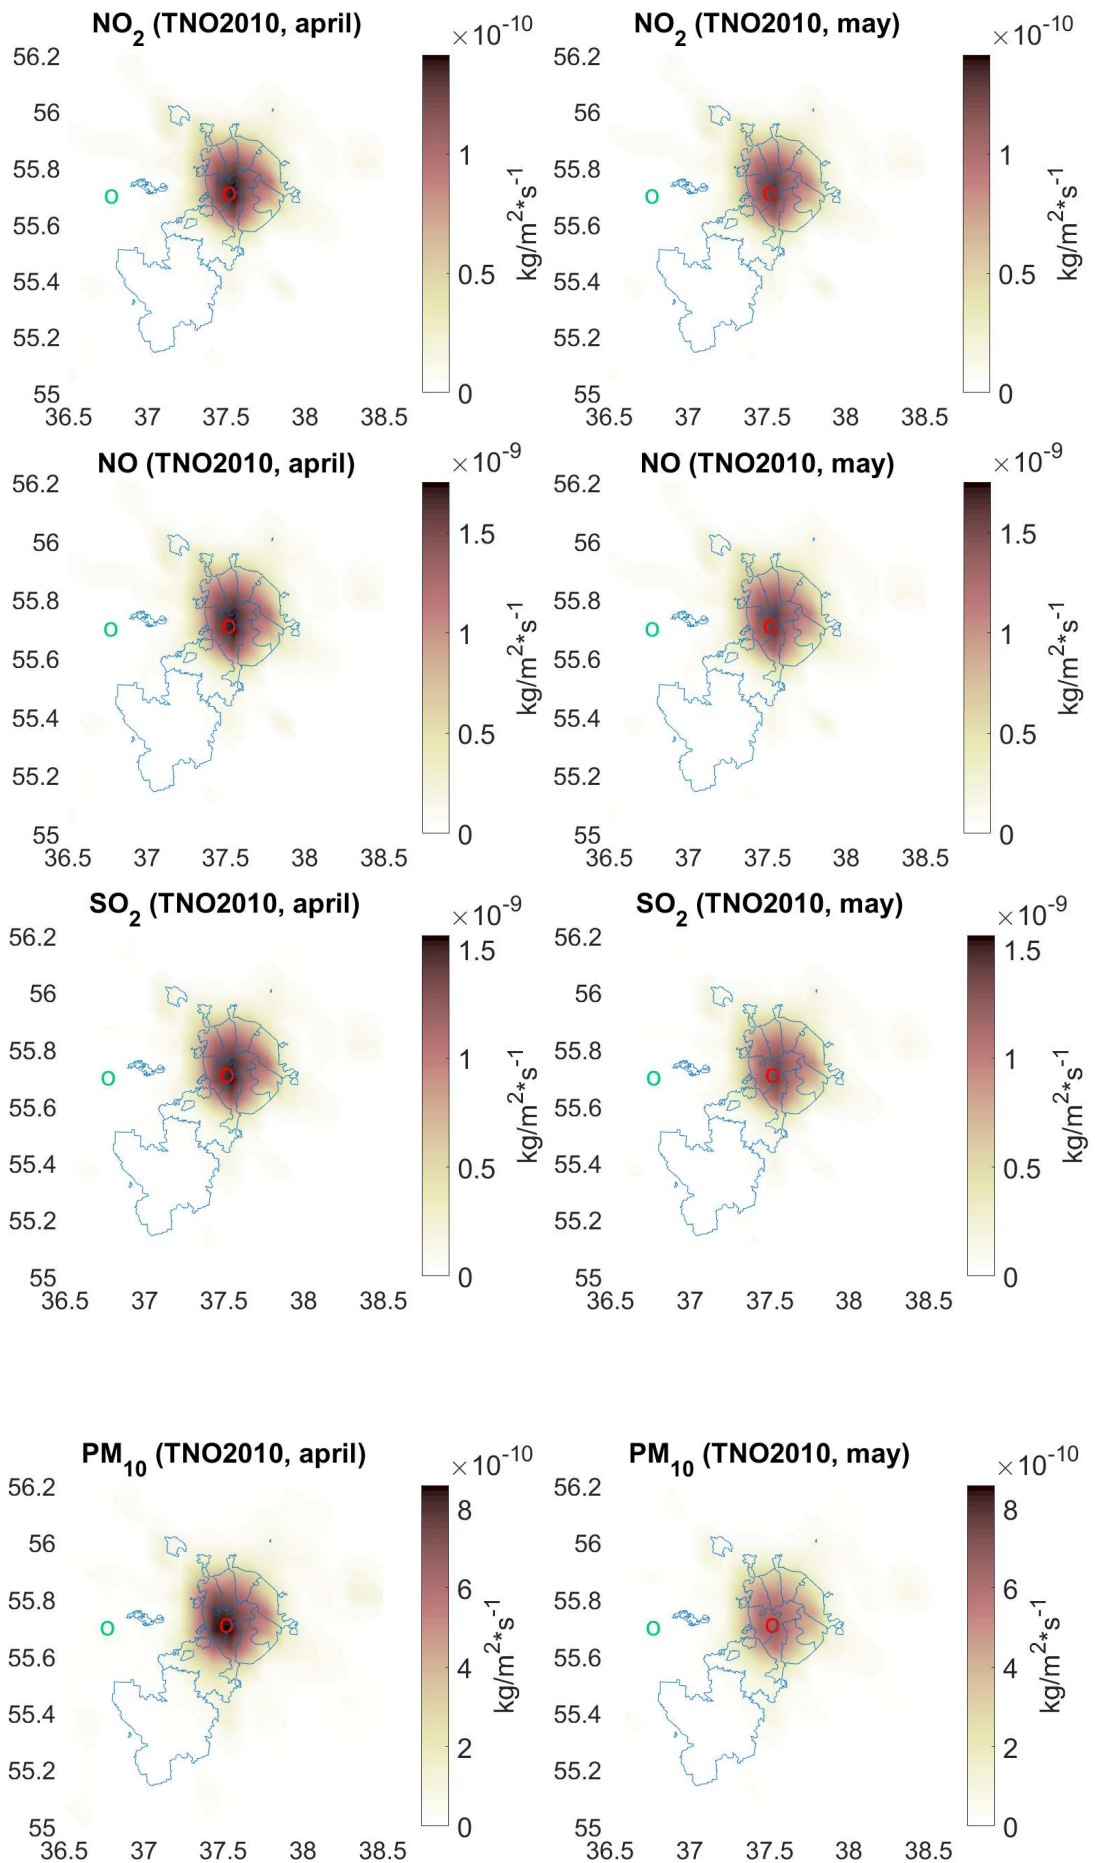

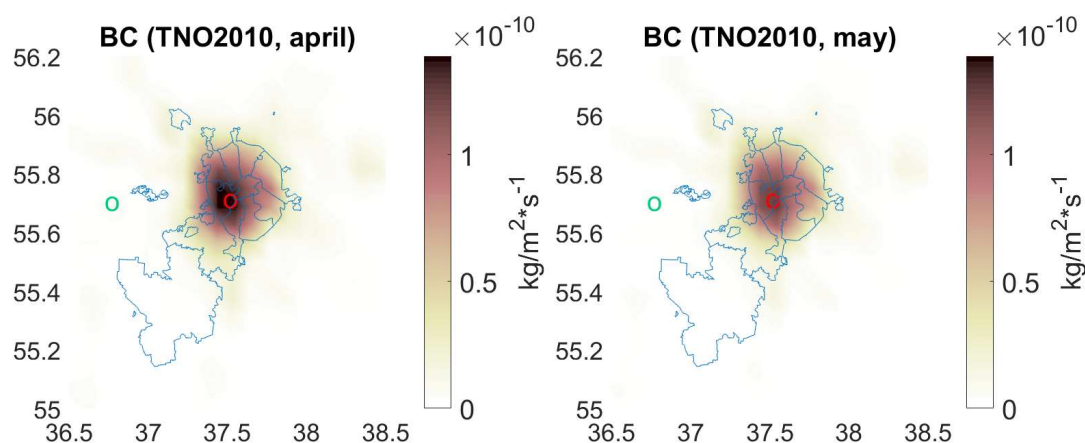

**Figure 2: Monthly mean emissions of aerosol gas precursors, PM10 and BC emissions according to the TNO2010 inventory in April and May in Moscow region. The location of the Moscow State University Meteorological Observatory is shown by red circle and Zvenigorod site – by green circle.**

The caption has been changed in the following way:

**Figure 2: Monthly mean emissions of aerosol gas-precursors, PM10 and BC emissions according to the TNO2010 inventory in April and May in Moscow region. The location of the Moscow State University Meteorological Observatory is shown by red circle and Zvenigorod site – by green circle.**

*Also, please comment with respect to how representative are the 2010 emissions for the measurement period (2018 and 2019).*

Before the application of the TNO2010 emissions we have made the comparisons with the available data on the older TNO2003-2007 dataset emissions for aerosol retrievals. According to the earlier data we received much larger AODurb effect, while the TNO2010 emissions provided close results to measurements for the year of our previous study (2018) (0.055 and 0.023 respectively compared with measured value of 0.03). That is why for the new experiments we decided to use these TNO2010 inventory data. The new preliminary experiments for Moscow, which are currently going with modern new CAMS-2019 emissions, have shown also similar level of the simulated urban aerosol and the same problems with too high SO<sub>2</sub> emissions (mean values over Moscow are 0.7e-09 kg\*m<sup>-2</sup>\*c<sup>-1</sup> (TNO2010) and 1e-09 kg\*m<sup>-2</sup>\*c<sup>-1</sup> (CAMS)). In addition, we should mention that the intensity of anthropogenic pollutant emissions should be adapted to be used in Chemical Transport Model, and this adaptation proves to have more impact on the simulation quality than the inventory updates. The newer dataset was used in the continued work, but for the study covered in this paper TNO2010 data proved to be appropriate, except for SO<sub>2</sub> emissions, which is discussed in the text.

We added the following text on this account:

Testing the model estimates with the TNO2010 and TNO2003-2007 inventory datasets against observations provided much better agreement for urban aerosol, when TNO2010 was used (“Aerosol urban pollution and its effects on weather, regional climate and geochemical processes”, 2020). This enables us to apply TNO2010 inventory in this study. The preliminary comparisons with the modern CAMS inventory dataset for 2019 also showed an agreement of the urban aerosol estimates.

Lines 198-199 “We consider that our BC measurements in Moscow provide the BCurb component, whereas the black carbon is mainly formed and emitted in the urban environment (see Fig. 2).”: The BC emissions are not depicted in Figure 2; please clarify

what you mean by citing Fig. 2. In any case, I agree that BC is mainly emitted in the urban environment.

Sorry! Somehow BC emissions disappeared from Fig.2. Now they are included there.

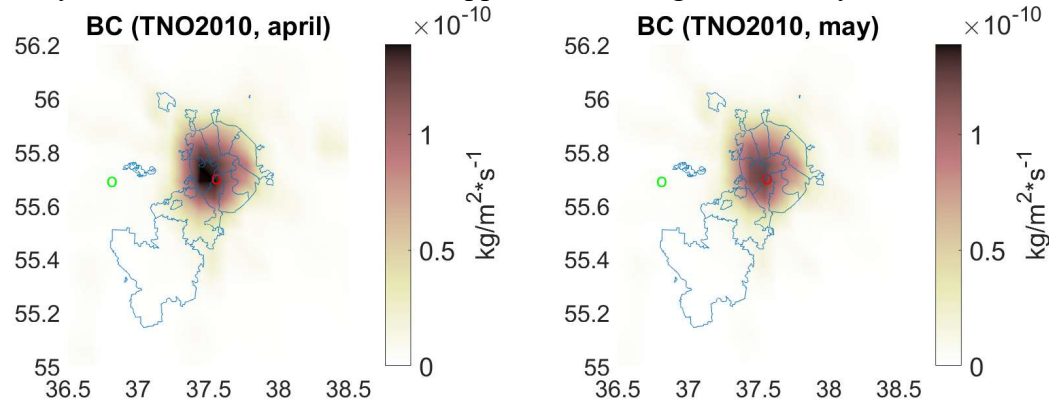

**Figure 2: Monthly mean emissions of aerosol gas-precursors, PM10 and BC emissions according to the TNO2010 inventory in April and May in Moscow region. The location of the Moscow State University Meteorological Observatory is shown by red circle and Zvenigorod site – by green circle.**

Table 1: Please specify that PM10 and BC measurements correspond to surface observations and not the total column of the atmosphere, as noted in the Table caption. Also, please correct “Confident interval at 0.05” to “Confidence interval at 0.05”.

Done. The updated caption is the following:

**Table 1.** Statistics of hourly mean aerosol characteristics in the total column of the atmosphere and at surface including aerosol optical depth (AOD at 500nm), Angstrom Extinction Exponent, Fine mode fraction at 500 nm, single scattering albedo (SSA) at 675nm, factor of asymmetry (ASY) for fine, coarse and total aerosol at 675nm, water vapor content (W, cm) and surface mass concentrations of PM10, BC, different aerosol gas-precursors, and BC/PM10 ratio. Moscow. April-May, 2018-2019.

Figure 4: Please note the units for all parameters presented. You may include this in the caption, if it is too complicated to include it on the axis.

Done. We are not sure that it is important to mark, that AOD and IPD are unitless values. We added missed units in the Caption:

**Figure 4: Daily means of AOD500, fine mode AOD fraction at 500 nm, PM10 (in mg m<sup>-3</sup>) and aerosol gas precursors (NOx, CHx) mass concentrations (in mg m<sup>-3</sup>), BC/PM10 ratio, water vapor content (in cm) and IPD index in 2018 (a) and 2019 (b).**

Table 2 and related discussion: Most of the correlations discussed in Lines 260-287 are statistically significant but display a low correlation coefficient. In my opinion, a correlation coefficient below 0.5 does not really imply significant relationship between the two parameters. For example, the authors state “We obtained a statistically significant correlation of columnar AOD500 with surface PM10, and BC. A more pronounced dependence of both BC and PM10 with fine AOD500 mode could be explained by the fine mode BC composition and the predominant fraction of fine aerosol mode in PM10 in urban aerosol in Central and Northern Europe”; these correlations correspond to coefficients of 0.34 and 0.39 for BC with columnar AOD500 and fine AOD500 mode, respectively, which I

*think are too low to show real correlation. A better correlation is observed for PM<sub>10</sub> with AOD<sub>500</sub>; nevertheless, I don't see a difference between AOD 500 and fine AOD<sub>500</sub> mode (correlation coefficient of 0.57 versus 0.58). Similarly, no correlation can be claimed for the fine AOD<sub>500</sub> mode and SO<sub>2</sub> concentrations, while only low correlations are observed for the other gaseous precursors.*

We agree with the reviewer that in some case our statements were too optimistic and correlations between some characteristics, of course, were not very high. Of course, a lot of other factors are also important, that makes the correlation low. We have updated the text in the following way to smooth or remove these statements:

“A correlation matrix has been estimated for evaluating the relationship between different columnar and surface aerosol characteristics, aerosol gas precursors and meteorological parameters (Table 2). There is high correlation between AOD<sub>500</sub> and fine AOD<sub>500</sub> mode, which is dominant in Central and East Europe (Logothetis et al., 2020). The prevailing fine aerosol mode fraction is also observed in PM<sub>10</sub> in urban conditions over Central and Northern Europe (see, for example, Fig. 10 in Wu and Boor, 2021). Relatively high correlation is detected between surface measurements of PM<sub>10</sub> with BC and gas aerosol precursors, except SO<sub>2</sub>, which indicates the importance of these substances for aerosol formation. We also obtained a statistically significant, but not very high correlation of columnar AOD<sub>500</sub> with surface PM<sub>10</sub>, and BC. Fine AOD<sub>500</sub> mode has slightly higher correlation with BC, which could be explained by the fine mode BC composition (Bond et al., 2013). The importance of secondary urban aerosol in columnar fine mode AOD<sub>500</sub> (Dubovik et al., 2002) has been also proved by a statistically significant correlation between fine AOD<sub>500</sub> mode and aerosol gas precursors (NO<sub>x</sub>, SO<sub>2</sub>, CH<sub>x</sub>), however, the correlation coefficients are not high due to complexity of the chemical and meteorological processes.”

*I believe a more fruitful discussion may be based on the correlation analysis graphs (e.g. Figures 5 and 6), where interesting observations can be made (as in Lines 289-309). Please also consider revising the corresponding comments in the Conclusions section.*

Concerning Fig5, we suppose that the correlation analysis would not be very indicative. We made some changes in the following way:

“A more detailed analysis of the relationship between AOD<sub>500</sub> and PM<sub>10</sub> surface mass concentrations shown in Fig. 5a demonstrates that along with the existence of general not very high correlation (see Table 2) there is a split into two types of dependences at a point of bifurcation of PM<sub>10</sub> ~0.05 mg m<sup>-3</sup>. A weaker AOD<sub>500</sub> dependence versus PM<sub>10</sub> characterizes the accumulation of PM<sub>10</sub> only in the low layer (due to local emission sources near the surface) in the absence of the pronounced AOD<sub>500</sub> increase with many cases at IPD=1, relating to the low intensity of particle dispersion. A more pronounced dependence between AOD<sub>500</sub> and PM<sub>10</sub> is associated with the influence of air mass advection, when the concentration of surface particles increases simultaneously with AOD<sub>500</sub>. In this case only few cases at IPD=1 are observed (Fig. 5a). The increase in PM<sub>10</sub> is also connected with a significant increase in fine mode AOD<sub>500</sub> fraction and the total absence of its low values at high PM<sub>10</sub> levels (Fig. 5b). The existence of these two dependences may explain not very high correlation between AOD<sub>500</sub> and PM<sub>10</sub> for the whole dataset.

In Discussion and in Conclusions the text has been changed/removed.

In Discussion:

We obtained high correlation between AOD<sub>500</sub> and fine AOD<sub>500</sub> mode, which was typical for Central and East Europe (Logothetis et al., 2020). Fine aerosol mode fraction is also dominating in PM<sub>10</sub> in urban regions of Central and Northern Europe (Wu and Boor, 2021). We found relatively high correlation between surface measurements of PM<sub>10</sub> and BC with gas aerosol precursors, except SO<sub>2</sub>.



In Conclusions:

We found the predominance of fine AOD500 mode in AOD500 and a statistically significant, though not very high correlation, between columnar AOD500 and surface PM<sub>10</sub> mass concentrations due to splitting their dependence in two different ones. Relatively high correlation between surface measurements of PM<sub>10</sub> and BC are observed with aerosol gas precursors, except SO<sub>2</sub>.

Concerning Fig.6: we have added the analysis of correlation for different IPD regimes in the following way:

“Note, that the account of IPD can additionally increase correlation between BC and PM<sub>10</sub> (R=0.94 for IPD=1, R=0.81 for IPD=3, compared with R=0.64 for the whole dataset). Similar, however, smaller increase in correlation is observed after the IPD account in relationship between BC and NO<sub>2</sub> (R= 0.74 for IPD=1, R=0.85 for IPD=3 compared with R=0.7 – for the whole dataset).”

Line 318: Please correct “solar elevations” to “solar radiation”.

Done. Thanks.

Figure 8: I would suggest to include also the % of the urban component with respect to total variable. In my opinion, the absolute values of the urban component of the different parameters do not show clearly the impact of the city on local/regional air quality.

Thank you for the suggestion. We added the ratio of AOD<sub>urb</sub>/Total AOD at 500 nm and some description of this quantity. The absolute values are also important, since they demonstrate in the first approximation, radiative effect of urban aerosol, because AOD is the characteristics of solar irradiance attenuation.

The text has been changed in the following way:

The AOD<sub>urb</sub>/AOD ratio at 500nm comprises about 19%. No statistically significant difference in the coarse AOD mode was found between Moscow and clean unpolluted site.

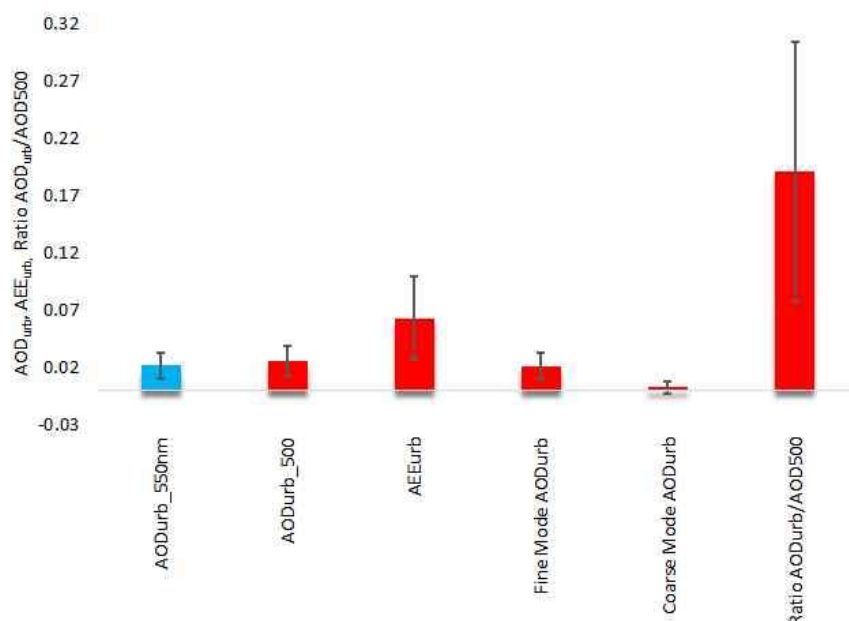

“Figure 8: Annual mean urban components of different aerosol parameters - AOD<sub>urb</sub> at 550nm and at 500 nm, Fine Mode AOD<sub>urb</sub>, Coarse Mode AOD<sub>urb</sub>, urban component of the Angstrom Extinction Exponent AEE<sub>urb</sub> and AOD<sub>urb</sub>/AOD500 ratio with confidence intervals at 0.05 significance level. The inset shows the mean AOD<sub>urb</sub> spectral dependence. Comment: we show the AOD at two wavelengths to provide more convenient comparisons with the CIMEL sun-photometer observations (AOD at 500 nm) and model results (AOD at 550 nm). Moscow. 2006-2020.”

Figure 9 caption: “Figure 9: (a) - Time series of AOD at 550 nm simulated using direct observations of AOD 915 at 500nm and AEE at 440-870nm, and the AODurb component according to measurements and modelling in 2018 (left upper panel) and 2019 (right upper panel)”: The caption is not so clear. The simulated AOD at 550 nm corresponds to the total AOD or maybe the AODurb component?

Sorry, the caption of this Figure was unclear. We consider both urban AODs and total AOD taken from measurements. The updated caption is the following:

**Figure 9: (a) - Time series of AOD550 from observations (AOD Moscow (obs)), and its urban components from observations (AODurb (obs)) and modelling (AODurb(mod)) in 2018 (left upper panel) and 2019 (right upper panel); (b) – Time series of PM<sub>10</sub> from observations (PM<sub>10</sub> Moscow (obs), in mg m<sup>-3</sup>), and its urban components (in mg m<sup>-3</sup>) from observations (PM<sub>10urb</sub>(obs)), and modelling, (PM<sub>10urb</sub>(mod)). 2018.**

Table 3: I don't understand how the PM10 model values were obtained. According to the Methods section (and in particular Lines 176-178), only the anthropogenic component of the surface mass concentrations of PM10 was simulated. The same question holds for BC model data presented in Table 3. In addition, how do the authors obtain the BC value used in the BCurb/BC ratio mentioned in Line 367?

Sorry it was not well written in the text. We made changes in the section, where the methods are described. Yes, no aerosol is presented at boundary layers, but over our territory we have small biogenic natural emissions. This means that when we simulate PM10 and AOD, we should extract their small content from total content for having comparisons with measured urban component of aerosol. Now we added the description in the text in the Section 2.1.2:

Urban aerosol sources according to the TNO2010 include direct emission of particulate matter of undefined composition (as dust fraction) and soot, as well as the gas-aerosol precursors of sulphate, organic, and nitrate secondary aerosols. The model also accounts for relatively small natural biogenic emissions of non-methane volatile organic compounds from the Global Land Cover 2000 project, which are the gas precursors of organic aerosol.

Lines 371-375 “We analyzed if there is a relationship between urban aerosol component and the total aerosol content. Figure 10 presents the dependence of model and measured AODurb on total AOD according to the MSU MO measurements, and the dependence of PM10urb on PM10. There is a positive correlation of urban aerosol component for AOD and PM10 with total AOD and PM10.”:

I think there are some issues with respect to the discussion of Figure 10.

For one, since the urban component is part of the total variable, a good positive correlation between these two does not clearly imply the simultaneous formation of natural and anthropogenic aerosol; It may be also related to meteorological conditions favouring the accumulation of pollutants. Also, a good correlation as the one displayed in Figure 10(c) suggests a constant PM10urb/PM10 ratio, so a constant % contribution of the urban component.

In the case of AOD, I don't think the AODurb observations (Figure 10(a)) demonstrate a correlation with the total AOD. For the AODurb model (Figure 10(b)), there seems to be a positive correlation for higher AOD values (above 0.2). I think a better picture could be obtained if the authors plotted the ratio of PM10urb/PM10 (and AODurb/AOD) over the PM10 (and AOD). It would be interesting to comment if for higher AOD values, the anthropogenic component contributes more. For PM10, this does not seem to be the case.

Thank you for the suggestion. We added the ratios on the plots with the absolute values. You are right. The PM10 urban component is quite stable according to measurements. It is more complicated figure for AOD. We made the necessary changes and added the following text and updated Fig.10:

Urban aerosol may have relationship with natural aerosol, since they both are determined by chemical composition of the atmosphere and meteorological conditions. For evaluating their relations, we analyzed the dependences between the urban aerosol component and its total amount. Figure 10a,b presents model and measured AOD<sub>urb</sub> and AOD<sub>urb</sub>/AOD550 ratio as a function of total AOD550 according to the MSU MO measurements. There are large

variations in  $AOD_{urb}$  obtained from measurements and modelling. According to model results, there is a slight positive  $AOD_{urb}$  increase at  $AOD_{550} > 0.2$ . The absence of the dependence for measured  $AOD_{urb}$  versus  $AOD$  at 550 nm (see Fig. 10a) can be observed due to a significant contribution of the advection of natural aerosol with high  $AOD$ . Figure 10c,d presents similar dependencies but for  $PM_{10urb}$  and  $PM_{10urb}/PM_{10}$  ratio as a function of the observed  $PM_{10}$  in Moscow. At surface layer, a positive correlation dependence between  $PM_{10urb}$  and  $PM_{10}$  is more pronounced, especially that obtained from observations. This can be explained by higher concentrations of aerosol gas precursors both of urban and natural origin, which, in turn, have high correlations with  $PM_{10}$  (see Table 2). The analysis of  $AOD_{urb}/AOD_{550}$  and  $PM_{10urb}/PM_{10}$  ratios has revealed a tendency to decrease at high aerosol content. This may mean that large aerosol content in Moscow is observed due to advection, while the contribution of urban aerosol (higher than 50-100%) is important at relatively small aerosol level of about  $AOD=0.1-0.2$  or  $PM_{10} < 0.04 \text{ mgm}^{-3}$ .

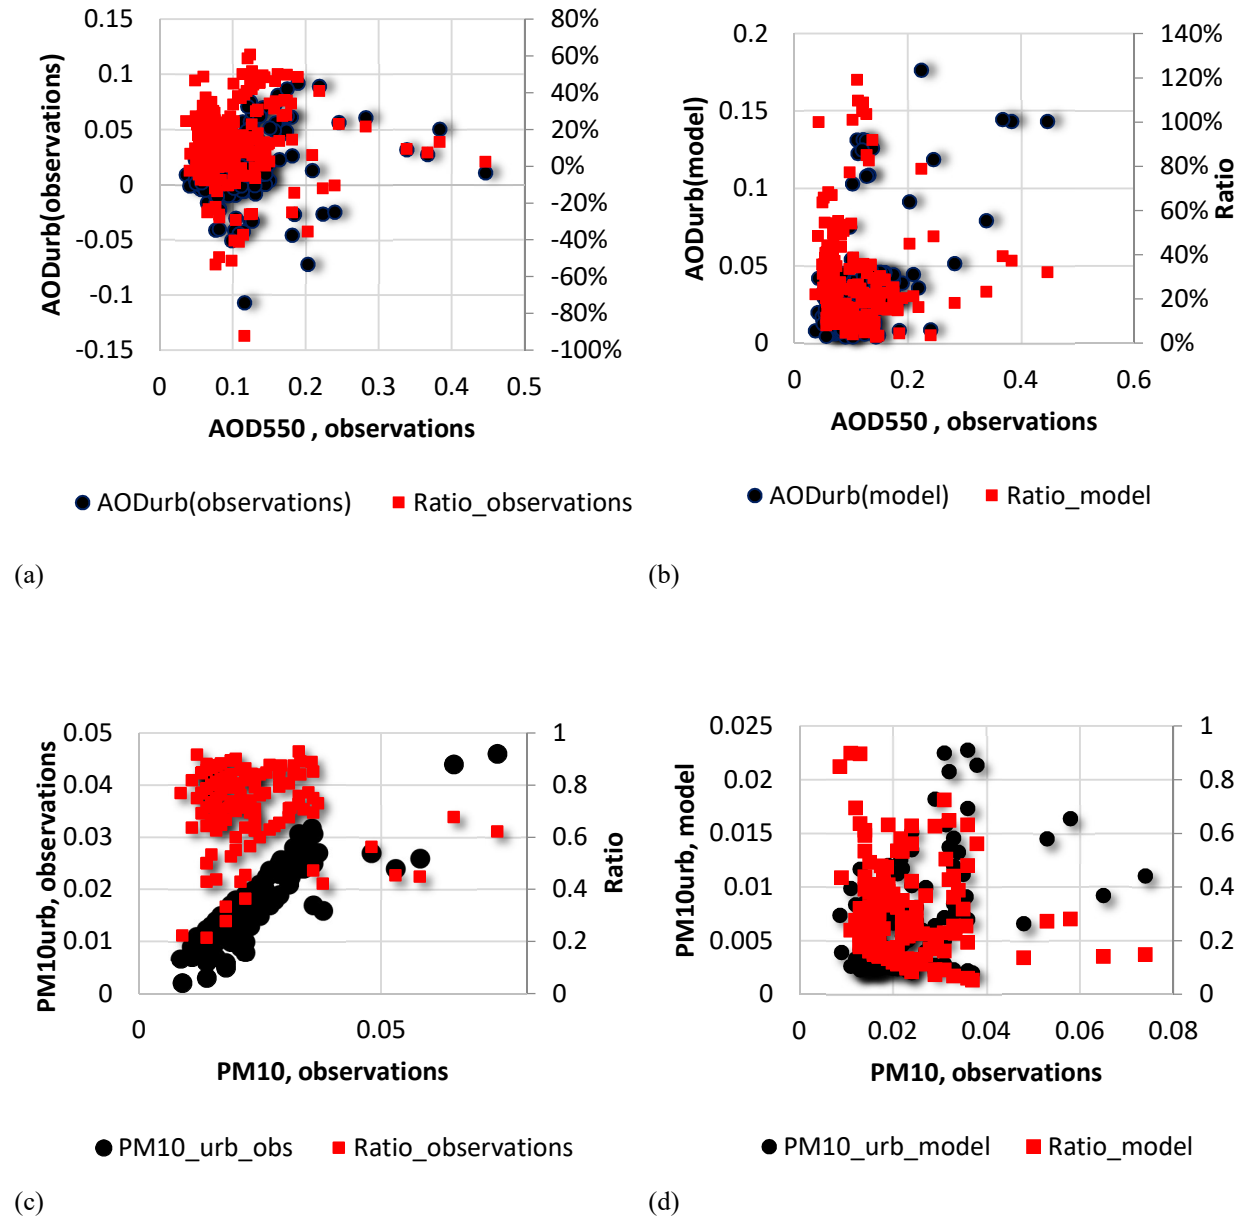

Figure 10: Measured (a,c) and model (b,d) urban component of aerosol optical depth at 550 nm ( $AOD_{urb}$ ), urban  $PM_{10}$  mass concentration ( $PM_{10urb}$ , in  $\text{mg m}^{-3}$ ) and their ratios to the observed total  $AOD_{550}$  and  $PM_{10}$  as a function of the observed total  $AOD_{550}$  and  $PM_{10}$  in Moscow (MSU MO). For consistency reason we show only quasi-simultaneous  $AOD$  and  $PM_{10}$  measurements during the daytime period with  $AOD$  observations. The cases affected by biomass burning aerosol were excluded. Clear sky conditions.



Lines 376-377 “This may be also accompanied by higher concentrations of aerosol gas precursors both of urban and natural origin, which, in turn, have high correlations with PM10 and AOD according to Table 2.”:

According to Table 2, I don't think the authors can claim a high correlation between gas precursors and AOD (R between 0.17-0.34). For PM10, I agree that the correlation coefficients show high correlations (at least for NO2 and CHx).

We have made following changes removing AOD from this paragraph:

This can be explained by higher concentrations of aerosol gas precursors both of urban and natural origin, which, in turn, have high correlations with PM<sub>10</sub> (see Table 2).

Lines 395-397 “Both simulated and measured PM10<sub>urb</sub> values have a pronounced dependence on IPD with higher PM10<sub>urb</sub> at lower level of intensity of particle dispersion. Note, that the influence of the intensity of particle dispersion on AOD<sub>urb</sub> is not observed.”: I don't understand how we can observe the dependence of the PM10 urban components on IPD, based on Figure 11. The relationship between the data obtained from model and observations varies, depending on the IPD value; but the PM10<sub>urb</sub> values display a wide range in all 3 cases of IPD.

You are right, of course. It was a wrong interpretation of data. Only for the simulated PM10 we have the dependence on IPD, but no simultaneous effects in both measured and modeled urban component have been obtained. This part of the text has been removed.

Figure 12: To my understanding, IPD will also vary during the day, so I am not sure how different diurnal cycles may be calculated for different IPD values. I would expect to see the diurnal cycle of the urban component (based on model and measurements), along with the emissions (when available) and the IPD value. The day-time and night-time meteorology and atmospheric conditions affect the IPD levels, so I am not sure what is the meaning of selecting the IPD values. Did the authors group the days by a daily average IPD value and then calculate the average diurnal cycle for each group (for mean 24hr IPD =1, 2 or 3)?

Fig.12 was made as a composite of hourly values at different IPD values. We have changed the caption and made necessary changes in the text. We guess this is a way to show the effect of the influence of the intensity of particle dispersion on urban fraction of different aerosol characteristics.

“Figure 12 shows the composite diurnal cycles of AOD, PM<sub>10</sub> and BC at different IPD, as well as the primary emissions of black carbon and PM<sub>10</sub> according to TNO2010 inventory. In general, there are noticeable diurnal changes of model and experimental data at the surface layer, which has some specific features depending on IPD. One can see the accumulation of PM<sub>10</sub> and BC at night below the inversion layer in the stable atmosphere, which is characterized by IPD=1. Note, that during daytime (from 10 to 17 h) the conditions with IPD=1 were never recorded, because of warming up the surface and the amplification of convection.

As for columnar AOD characteristic, there is no evident diurnal cycle of measured AOD<sub>urb</sub> during daylight hours, however, model AOD<sub>urb</sub> values demonstrate a small increase at night, especially, in conditions with IPD=1. Figure 12b,c shows a noticeable dependence of BC<sub>urb</sub> and PM<sub>10urb</sub> on IPD index, especially for night and early morning conditions. Elevated values of the surface urban aerosol at night in conditions with IPD=1 reach 30-40 µg m<sup>-3</sup> for PM<sub>10urb</sub>, and 3-3.5 µg m<sup>-3</sup> - for BC<sub>urb</sub>.”

The caption is the following:

Figure 12: **The composites of the** diurnal cycle of AOD<sub>urb</sub>(a), PM<sub>10 urb</sub> (b) and BC<sub>urb</sub> mass concentrations (c) according to measurements and modelling for different conditions of the intensity of particle dispersion (IPD). For PM<sub>10</sub> and BC the diurnal cycle of their emissions is also shown. The confidence intervals were calculated at 0.05 significance level. Moscow.
